# Supplementary material for: Low-temperature synthesis of 2D MoS2on a plastic substrate for a flexible gas sensor
Source: Royal Society of Chemistry journal article supplement (doi:10.1039/c8nr00108a), 2018-01-01
Supplement: c8nr00108a1.pdf [file c8nr00108a1.pdf]

## Electronic Supplementary Information

### Low-Temperature Synthesis of 2D MoS<sub>2</sub> on a Plastic Substrate for a Flexible Gas Sensor

Yuxi Zhao<sup>&</sup>, Jeong-Gyu Song<sup>&</sup>, Gyeong Hee Ryu, Kyung Yong Ko, Whang Je Woo, Youngjun Kim, Donghyun Kim, Jun Hyung Lim, Sunhee Lee, Zonghoon Lee, Jusang Park\* and Hyungjun Kim\*

#### A. Optical microscope images for CVD MoS<sub>2</sub>

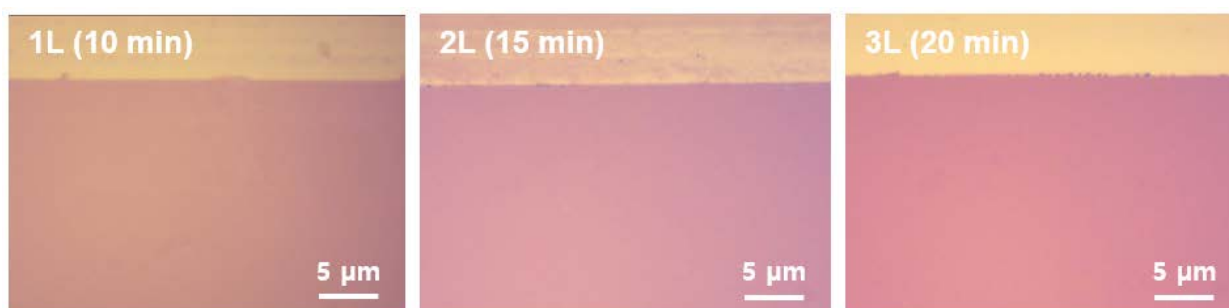

**Fig. S1** OM images of CVD MoS<sub>2</sub> grown on SiO<sub>2</sub> substrate for 10 min, 15 min and 20 min of process time

## B. Raman and PL for the synthesized MoS<sub>2</sub>

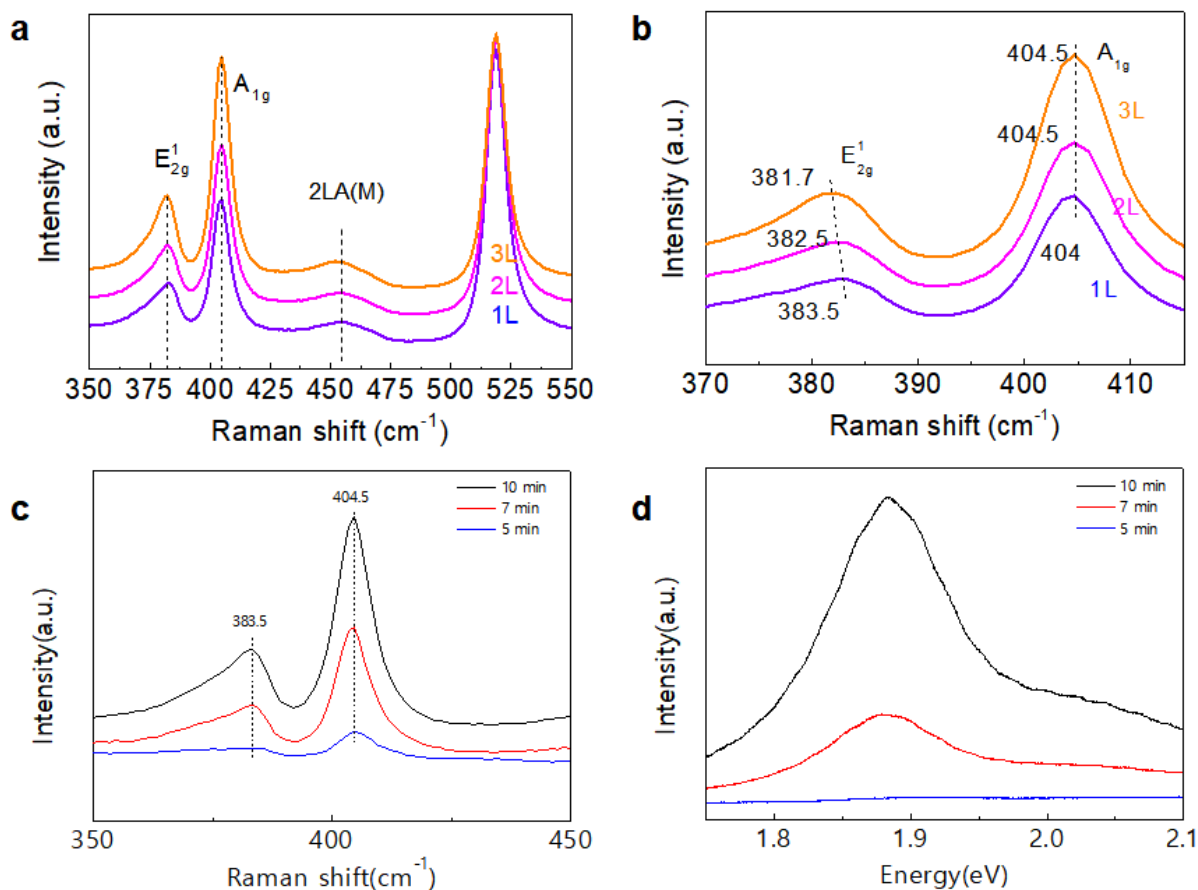

**Fig. S2** (a-b) Different x-axis scale Raman spectrum for the synthesized 2D MoS<sub>2</sub> for 10 min, 15 min, 20 min. (c) Raman and (d) PL measurements for the synthesized 2D MoS<sub>2</sub> for 5 min, 7 min, 10 min.

### C. Raman and PL mapping of MoS<sub>2</sub>

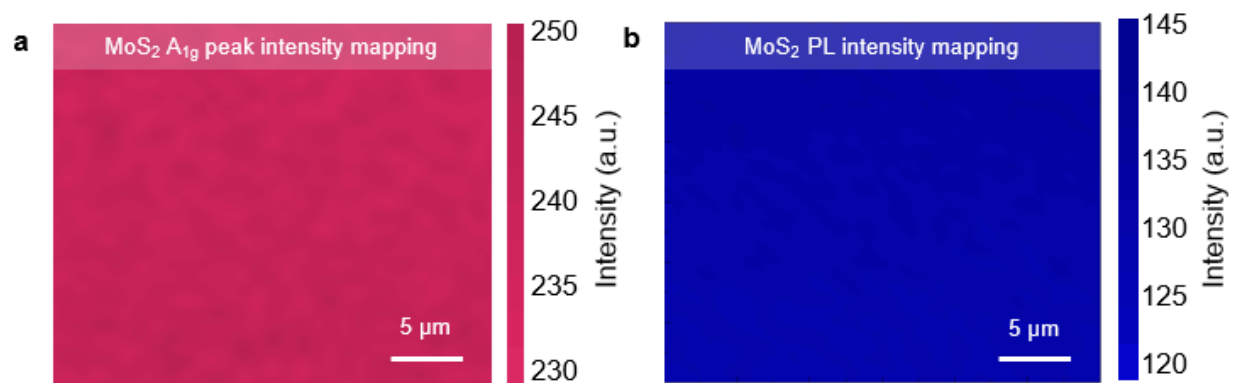

**Fig. S3** (a) Raman intensity mapping and (b) PL intensity mapping of CVD MoS<sub>2</sub> grown on SiO<sub>2</sub> substrate for 10 min.

#### D. MoS<sub>2</sub> transferred from PI to SiO<sub>2</sub>

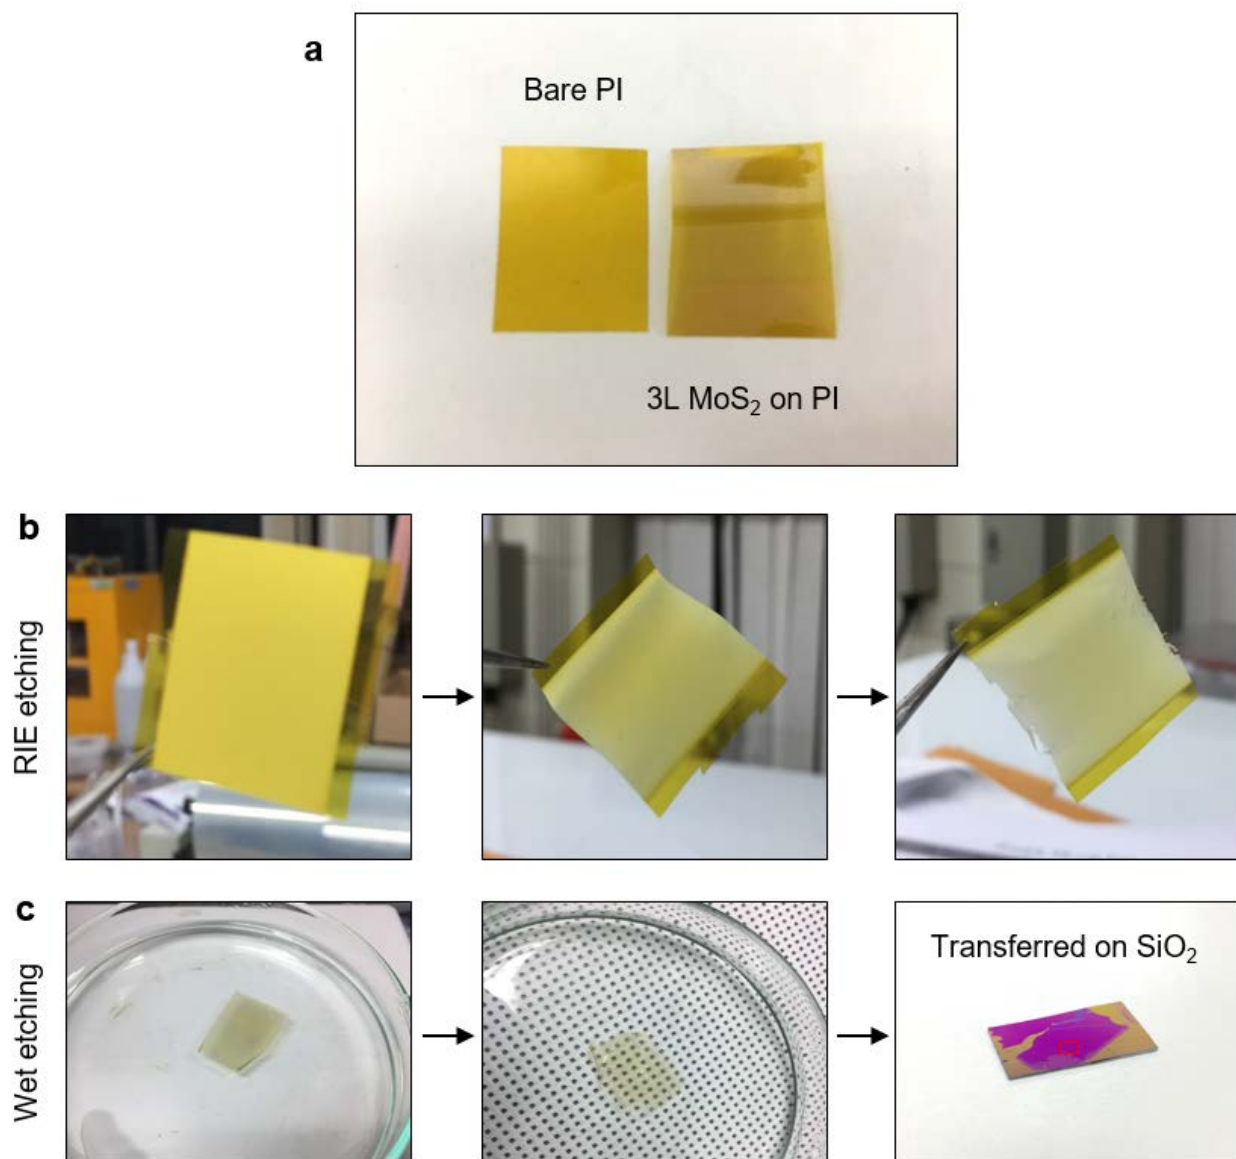

**Fig. S4** (a) Optical image of bare PI and deposited with 3L MoS<sub>2</sub>.(b) RIE etching (c) Wet etching during 2D MoS<sub>2</sub> transferred from PI to SiO<sub>2</sub>.

### E. Characteristics of the 2D MoS<sub>2</sub> based flexible gas sensor

The sensors show rapid current changes upon exposure to the low concentration of NO<sub>2</sub> or NH<sub>3</sub> gas in the beginning, but then quasi-saturation behaviors are observed when gas concentrations became higher.

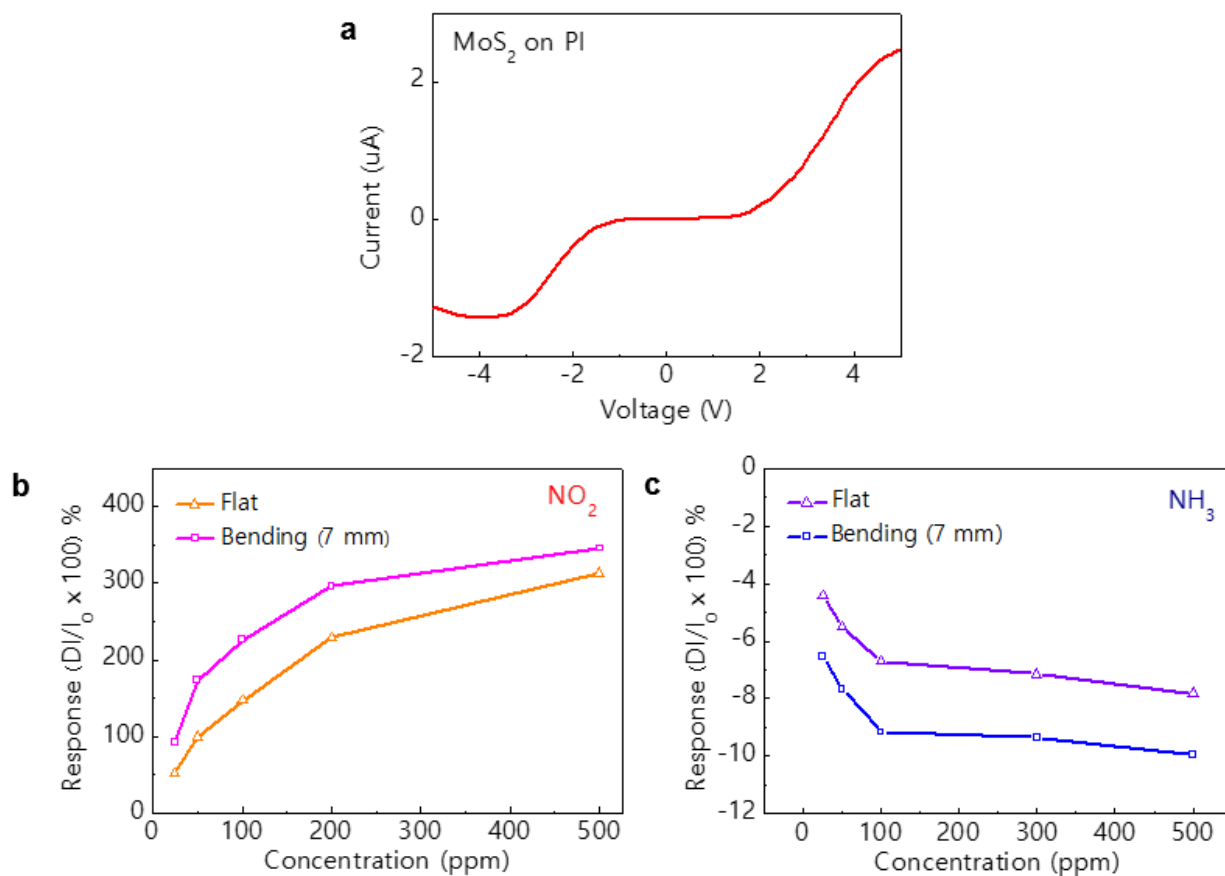

**Fig. S5** (a) I-V characteristics of the 2D MoS<sub>2</sub> based flexible gas sensor. (b) Response versus NO<sub>2</sub> concentration (25, 50, 100, 200, 500 ppm). (c) Response versus NH<sub>3</sub> concentration (25, 50, 100, 200, 500 ppm).
